# Supplementary material for: Diet Quality and Its Association with Lifestyle and Dietary Behaviors among Croatian Students during Two COVID-19 Lockdowns
Source: MDPI journal article supplement (doi:10.3390/foods12132532), 2023-06-29
Supplement: s1 [file s1]

## Supplementary Material

The questionnaire in its entirety is available upon request at: Magdalena Czapka-Matyasik, Poznan University of Life Sciences, Department of Human Nutrition and Dietetics, Poznan, Poland: [magdalena.matyasik@up.poznan.pl](mailto:magdalena.matyasik@up.poznan.pl)

The basic sections of the questionnaire with related questions are listed in Table S1.

**Table S1.** Overview UNI-COVID questionnaire used to collect information on dietary and lifestyle behavior during two COVID-19 Lockdowns

| Section 1                                                                                                                                                                                                                                                                                                                                                                                                                                                                                                                                                                                                                                                             |
|-----------------------------------------------------------------------------------------------------------------------------------------------------------------------------------------------------------------------------------------------------------------------------------------------------------------------------------------------------------------------------------------------------------------------------------------------------------------------------------------------------------------------------------------------------------------------------------------------------------------------------------------------------------------------|
| Agreed to participate in this research without any additional explanation, without any pressure, and consciously                                                                                                                                                                                                                                                                                                                                                                                                                                                                                                                                                      |
| Identified its field of study                                                                                                                                                                                                                                                                                                                                                                                                                                                                                                                                                                                                                                         |
| Section 2: Demographic                                                                                                                                                                                                                                                                                                                                                                                                                                                                                                                                                                                                                                                |
| Gender                                                                                                                                                                                                                                                                                                                                                                                                                                                                                                                                                                                                                                                                |
| Age                                                                                                                                                                                                                                                                                                                                                                                                                                                                                                                                                                                                                                                                   |
| Weight & Height                                                                                                                                                                                                                                                                                                                                                                                                                                                                                                                                                                                                                                                       |
| Marital status                                                                                                                                                                                                                                                                                                                                                                                                                                                                                                                                                                                                                                                        |
| Place of residence (now & before social isolation period)                                                                                                                                                                                                                                                                                                                                                                                                                                                                                                                                                                                                             |
| What is your graduated level of education                                                                                                                                                                                                                                                                                                                                                                                                                                                                                                                                                                                                                             |
| Working before social isolation period                                                                                                                                                                                                                                                                                                                                                                                                                                                                                                                                                                                                                                |
| Household's overall situation                                                                                                                                                                                                                                                                                                                                                                                                                                                                                                                                                                                                                                         |
| Hours/day spent in front of the screen (watching TV, using a computer, smart phone; before & during isolation)                                                                                                                                                                                                                                                                                                                                                                                                                                                                                                                                                        |
| During social isolation, have you changed: (i) your screen time; (ii) eating behavior; (iii) body weight & (iv) duration of sleeping                                                                                                                                                                                                                                                                                                                                                                                                                                                                                                                                  |
| Section 3: Eating habits                                                                                                                                                                                                                                                                                                                                                                                                                                                                                                                                                                                                                                              |
| Before and during isolation period: (i) Cooking; (ii) Frequency of ordering food; (iii) Number of consumed meals;                                                                                                                                                                                                                                                                                                                                                                                                                                                                                                                                                     |
| (iv) Consumption of listed food: Bread (any type); Rice, pasta, tortilla, cereals; Red meat (beef, pork); Processed meat (cured meat, smoked sausages, hot-dogs); White meat (turkey, chicken); Fish and seafood; Vegetables; Fruit; Pulses-based food (legume, chickpeas, beans); Dairy product (milk, yogurt, cheese); Egg; Sweet snacks; Savory snacks; Nuts, almonds, seeds; (v) consumption of drinks with sugar (added or sweetened); (vi) Consumption of listed drinks (Water; Tea; Coffee; Juice (fruit or vegetables); Sweetened carbonated beverage e.g., Cola, Pepsi; Unsweetened beverage; Energy drinks; Alcoholic beverage) and (vii) Physical activity |
| Section 4: Psychological section                                                                                                                                                                                                                                                                                                                                                                                                                                                                                                                                                                                                                                      |
| Gathering a personal impression by checking the most appropriate statements to describe the participant                                                                                                                                                                                                                                                                                                                                                                                                                                                                                                                                                               |

**Table S2.** Students' characteristics according to the fields of study.

| Field of study |        | Age<br>(mean $\pm$ SD) | BMI<br>(mean $\pm$ SD) | Gender      |               |              |
|----------------|--------|------------------------|------------------------|-------------|---------------|--------------|
|                |        |                        |                        | Male<br>(%) | Female<br>(%) | Other<br>(%) |
| Biotechnical   | Spring | 22.31 $\pm$ 2.59       | 22.06 $\pm$ 3.08       | 11.47       | 88.07         | 0.46         |
|                | Winter | 21.10 $\pm$ 2.17       | 21.58 $\pm$ 2.70       | 9.19        | 88.65         | 2.16         |
| Technical      | Spring | 22.43 $\pm$ 2.44       | 22.65 $\pm$ 3.15       | 27.91       | 72.09         | 0.00         |
|                | Winter | 21.54 $\pm$ 2.13       | 22.93 $\pm$ 3.78       | 32.78       | 65.84         | 1.38         |
| Social         | Spring | 22.52 $\pm$ 2.39       | 23.09 $\pm$ 4.01       | 6.48        | 93.52         | 0.00         |
|                | Winter | 21.98 $\pm$ 2.46       | 21.77 $\pm$ 2.64       | 6.30        | 93.70         | 0.00         |
| Biomedical     | Spring | 21.39 $\pm$ 2.14       | 22.17 $\pm$ 3.08       | 14.43       | 85.07         | 0.50         |
|                | Winter | 21.23 $\pm$ 2.46       | 21.88 $\pm$ 3.88       | 11.35       | 88.30         | 0.35         |
| Natural        | Spring | 21.51 $\pm$ 1.93       | 22.55 $\pm$ 3.98       | 15.07       | 82.19         | 2.74         |
|                | Winter | 21.21 $\pm$ 2.17       | 22.50 $\pm$ 4.05       | 25.56       | 72.93         | 1.50         |
| Humanistic     | Spring | 23.81 $\pm$ 3.32       | 22.68 $\pm$ 4.33       | 10.34       | 87.93         | 1.72         |
|                | Winter | 21.91 $\pm$ 2.41       | 21.71 $\pm$ 2.89       | 7.69        | 90.77         | 1.54         |
| Artistic       | Spring | 21.14 $\pm$ 2.12       | 24.59 $\pm$ 5.20       | 14.29       | 85.71         | 0.00         |
|                | Winter | 20.61 $\pm$ 2.53       | 21.80 $\pm$ 2.86       | 3.57        | 92.86         | 3.57         |
